1 **Hydroxymethylated-*P16* Allele Is Transcription-Inactive**

2 **Ying Gan<sup>#</sup>, Paiyun Li<sup>#</sup>, Xiao Han<sup>#</sup>, Sisi Qin, Chenghua Cui, Zhaojun Liu, Jing Zhou,**  
3 **Liankun Gu, Zhe-ming Lu, Baozhen Zhang\*, Dajun Deng\***

4 Key Laboratory of Carcinogenesis and Translational Research (Ministry of Education/  
5 Beijing), Division of Etiology, Peking University Cancer Hospital and Institute, Fu-Cheng-Lu  
6 #52, Haidian District, Beijing, 100142, China

7 <sup>#</sup> Equal contribution

8 \* Corresponding authors

9 **Author contributions**

10 YG and PL: elucidated the biological function of *P16* hydroxymethylation; SQ: discovered  
11 *P16* hydroxymethylation and its association with gastric carcinogenesis; XH: demonstrated  
12 the strand-bias distribution of 5hmCs in the *P16* alleles; CC, Z-mL, and BZ: constructed the  
13 *P16*-specific oxygenase; LG performed the animal experiments; BZ performed  
14 immunostaining and cell sorting assays and codesigned the study; ZL and JZ: carried out  
15 other experiments; DD: designed the study, analyzed the data, and wrote the manuscript.  
16 All authors read and approved the final manuscript.

17 **Running title:** DNA hydroxymethylation does not reactivate gene transcription

18

19 **ABSTRACT**

20 **Background:** 5-Methylcytosine can be oxidized into 5-hydroxymethylcytosine (5hmC) in  
21 the genome. Methylated-*P16* (P16M) can be oxidized into completely  
22 hydroxymethylated-*P16* (P16H) in human cancer and precancer cells. The aim of this study  
23 is to investigate the biological function of P16H.

24 **Methods:** True P16M and P16H were analyzed using bisulfite/TAB-based assays. A  
25 ZFP-based *P16*-specific dioxygenase (P16-TET) was constructed and used to induce  
26 P16H. Cell proliferation and migration were determined with a series of biological analyses.

27 **Results:** (A) The 5hmCs were enriched in the antisense-strand of the *P16* exon-1 in  
28 HCT116 and AGS cells containing methylated-*P16* alleles (P16M). (B) P16-TET induced  
29 both P16H and *P16* demethylation in H1299 and AGS cells and reactivated *P16* expression.  
30 Notably, P16H was only detectable in the sorted P16-TET H1299 and AGS cells that did not  
31 show *P16* expression. (C) P16-TET significantly inhibited the xenograft growth derived from  
32 H1299 cells in NOD-SCID mice, but did not inhibit the growth of *P16*-deleted A549 control  
33 cells. *P16*-siRNA knockdown could rescue P16-TET-inhibited cell migration.

34 **Conclusion:** Hydroxymethylated *P16* alleles are transcriptionally inactive.

35 **Key words:** *P16* gene; CpG islands; methylation; hydroxymethylation; epigenetic editing

36

37 **AUTHOR SUMMARY**

38 It is well known that 5-methylcytosine (5mC) in genomic DNA of mammalian cells can be  
39 oxidized into 5-hydroxymethylcytosine (5hmC) and other derivatives by DNA dioxygenase  
40 TETs. While conversion of 5mC to 5hmC plays an important role in active DNA  
41 demethylation through further oxidations, a certain proportion of 5hmCs remain in the  
42 genome. Although it is supposed that occurrence of 5hmCs may contribute to the flexibility  
43 of chromatin and the protection of the bivalent promoters from hypermethylation, the direct  
44 effect of 5hmCs on gene transcription is unknown. In the present study, we engineered a  
45 zinc-finger protein-based P16-specific DNA dioxygenase and used it to induce P16  
46 hydroxymethylation and demethylation in cancer cells. Our results demonstrate, for the first  
47 time, that the hydroxymethylated P16 alleles retain transcriptionally inactive. This is  
48 supported by our recent findings that mRNAs are always transcribed only from the  
49 unmethylated P16 strands, but not from the hydroxymethylated/methylated strands in  
50 HCT116 cells, and that the risks for malignant transformation are similar for patients with  
51 the P16 methylation-positive oral epithelial dysplasia with and without P16  
52 hydroxymethylation in a prospective study.

53

## 54 INTRODUCTION

55 It is well known that ten-eleven translocation methylcytosine dioxygenases (TET-1/2/3)  
56 oxidize 5-methylcytosine (5mC) to 5-hydroxymethylcytosine (5hmC), 5-formylcytosine (5fC),  
57 and 5-carboxylcytosine (5caC) in the genome [1-4]. While oxidation of 5mC leads to active  
58 DNA demethylation, a certain proportion of 5hmC sites remain in the genome with a  
59 strand-asymmetric and strand-symmetric distribution pattern that provides its own  
60 regulatory function [5-9]. Although it is frequently reported that the 5hmC level of some  
61 genes is positively correlated with increased gene expression, it is not clear whether 5hmC  
62 itself or related DNA demethylation contribute to the reactivation of gene transcription.

63 Typical bisulfite-based assays cannot discriminate 5mCs from 5hmCs. The classic  
64 term “DNA methylation” is, in fact, total DNA methylation, including true methylation and  
65 hydroxymethylation. Total methylation of the CpG island (CGI) flanking the transcription  
66 start site (TSS) in the *P16* gene (*CDKN2A*) is prevalent in human cancer and precancerous  
67 tissues [10,11] and is linked to increased cancer development from epithelial dysplasia in  
68 many organs [12-18]. *P16* methylation (P16M) not only directly inactivates *P16* transcription  
69 [19] but also represses *ANRIL* transcription [20]. Our recent study demonstrated that there  
70 were dense 5hmCs in the *P16* exon-1 CGI in HCT116 cells, and no mRNA transcripts from  
71 the hydroxymethylated *P16* (P16H) alleles were detected in the cells [21,22]. P16H was  
72 detected in 9.3% of human oral epithelial dysplasia (OED) tissues [23]. However, the  
73 malignant transformation risk was similar between P16M-positive OED patients with and  
74 without P16H. It is a fundamental question in epigenetic research to clarify whether  
75 hydroxymethylation of TSS-flanking CGIs leads to transcriptional activation of genes.

76 In this study, we characterized the distribution patterns of 5hmCs within the sense and

77 antisense strands (S- and AS-strands) of the *P16* promoter and exon-1 CGIs using detailed  
78 TET-assisted bisulfite (TAB)-based assays, and found that 5hmCs were enriched in the  
79 AS-strands of *P16* exon-1 CGIs in cancer cells. To elucidate the possible role of P16H, an  
80 epigenetic editing tool, *P16*-specific TET-1 (P16-TET), was constructed and used to induce  
81 P16H in cancer cell lines. Notably, our data showed, for the first time, that P16H itself could  
82 not reactivate gene transcription.

## 83 **RESULTS**

### 84 **Characterization of 5hmCs in the *P16* Exon-1 CGI**

85 We recently found that there were dense 5hmCs in the *P16* exon-1 in HCT116 cells [21], in  
86 which the wildtype *P16* alleles are silenced by DNA methylation and the mutant alleles  
87 containing a G-insertion in exon-1 are unmethylated. To characterize the distribution  
88 pattern of 5hmCs in the *P16* CGI, the S- and AS-strands of the *P16* promoter and the  
89 exon-1 regions were amplified using conventional bisulfite-modified and TAB-modified  
90 single-strand DNA samples from HCT116 cells as templates. Next, the proportions of total  
91 P16M- and P16H-containing fragments were quantitatively analyzed by denaturing high  
92 performance liquid chromatography (DHPLC). As expected, the total P16M peak and the  
93 P16U peak were both detected in the all bisulfite PCR products from both the S- and  
94 AS-strands of the *P16* promoter and exon-1 fragments (Figure 1A-D: HCT116, left charts).  
95 However, a high P16H peak was detected only in the exon-1 AS-strand and the P16H  
96 proportion reached up to 88% (=0.77/0.87) (Figure 1D: HCT116\_TAB, left chart). In the  
97 promoter AS-strand fragment, the P16H peak was very low (Figure 1C: HCT116\_TAB, left  
98 chart). In the S-strands of the promoter and exon-1 fragments, much lower levels of the  
99 P16H peaks were detected (Figures 1A and 1B: HCT116\_TAB, left charts).

100 The TAB sequencing results for the HCT116\_TAB PCR products confirmed the  
101 DHPLC analysis results (Figure 1A-D: right charts). Dense 5hmCs were found in the  
102 wildtype exon-1 AS-strand (tracked with a G-deletion; 5hmC-density, 82.9%), but not in the  
103 paired S-strand (5hmC-density, 17.6%). No clone containing more than one 5hmC was  
104 detected in the promoter AS-strand (5hmC density, 2.0%). Sporadic 5hmCs were  
105 distributed in the promoter S-strand (5hmC density, 22.3%). Together, the results of the  
106 TAB-DHPLC and TAB sequencing analyses consistently demonstrated that 5hmCs were  
107 enriched mainly in the AS-strand of the wild-type *P16* exon-1 in HCT116 cells. This  
108 indicates that wild-type *P16* exon-1 is hydroxymethylated mainly in the AS-strand and is  
109 methylated truly in the S-strand in HCT116 cells. As described below, dense 5hmC sites  
110 were also detected in the AS-strand of the *P16* exon-1 in gastric cancer AGS cells.

### 111 **Construction of Engineered P16-TET**

112 To study whether P16H affects gene transcription, an expression controllable  
113 *P16*-specific dioxygenase P16-TET and its inactive mutant control vector were constructed  
114 through fusing an engineered *P16* promoter-specific seven zinc finger protein (7ZFP-6I) [24]  
115 with the catalytic domain of human TET1 and integrated into the pcDNA3.1 expression  
116 vector (Figure S2A). H1299 cells were chosen because epigenetic editing of the methylated  
117 *P16* CGIs by the *P16*-specific transcription factor (P16-ATF; 7ZFP-6I-VP64) has been  
118 optimized in this cell type [24]. As expected, the results of both qRT-PCR and  
119 immunofluorescence staining showed that the methylated *P16* alleles were re-activated in  
120 H1299 cells 6 days after transient transfection with the P16-TET vector (Figure 2). Such  
121 *P16* reactivation was not observed in the P16-TET mutant control cells. This indicates that  
122 P16-TET is *P16* gene reactive and could be used in further studies.

## 123 **Induction of P16H by P16-TET**

124 To study the possible biological functions of *P16*-specific hydroxymethylation, the  
125 *P16*-TET coding sequence was further integrated into the pTRIPZ lentivirus vector carrying  
126 a “Tet-on” switch to allow the gene expression to be controlled for stable transfection  
127 (Figure S2B). In the *P16*-TET stably transfected H1299 cells, the results of the TAB  
128 methylation-specific PCR (MSP) analysis showed that *P16H* signals appeared in the  
129 *P16*-TET cells 3 days after the induction of doxycycline (Dox; final conc. 0.25 µg/mL)  
130 (*P16*-TET&Dox\_3d; Figure 2A, TAB-MSP), but did not appear in cells transfected with the  
131 empty vector (control cells with Dox treatment) (Vector&Dox\_14d) or in baseline *P16*-TET  
132 cells without Dox induction, in which only nonhydroxymethylated *P16* alleles (*P16N*) were  
133 detected. In the MSP analysis, *P16U* was detectable in the *P16*-TET&Dox cells 3 days  
134 following Dox induction (Figure 3A, MSP). The bisulfite-DHPLC results showed that a low  
135 *P16U* peak was detected beginning on the 14<sup>th</sup> day (Figure S3A, red-arrow). Two *P16U*  
136 clones were also observed on the 28<sup>th</sup> day from the bisulfite sequencing (Figure S3B,  
137 red-star). These results indicate that both *P16H* and *P16U* were induced in the  
138 *P16*-TET&Dox cells.

139 Furthermore, the Western blot results revealed that *P16* protein was detected in the  
140 *P16*-TET&Dox cells since the 7<sup>th</sup> day, but not in the Vector&Dox control cells (7d; Figure  
141 3B). The qRT-PCR results showed a weak reactivation of *P16* transcription beginning on  
142 the 4<sup>th</sup> day (Figure 3C). The immunofluorescence confocal microscopy results confirmed  
143 the presence of *P16* protein in the nuclei of H1299 cells (Figure 3D). In addition, the  
144 expression status of the control genes *P15* and *P14* was not affected, whereas the  
145 expression level of *ANRIL*, which is coordinately expressed with *P16*, was increased

146 (Figure S4). This suggests a high specificity for the zinc finger protein-based P16-TET to  
147 induce P16H and P16U.

148 Similarly, on the 7<sup>th</sup> day after Dox induction, transcriptional reactivation of *P16* was also  
149 observed in P16-TET stably transfected gastric cancer AGS cells, in which *P16* alleles are  
150 homogenously methylated (Figures 4A-4E). Interestingly, P16U signals were not detected  
151 in P16-TET AGS cells after Dox induction for 11 days (P16-TET&Dox\_11d) in the  
152 bisulfite-DHPLC and bisulfite sequencing analyses (Figure 4A and 4C). P16H signals were  
153 observed in the TAB-DHPLC and TAB sequencing results (Figure 4B and 4D), indicating  
154 that hydroxymethylation occurred earlier than demethylation at P16 CGIs. A few baseline  
155 5hmCs were also found in the *P16* exon-1 AS-strand of AGS mock control cells. Although  
156 weak *P16* mRNA signals were detected in P16-TET AGS cells after Dox induction for 7  
157 days and 11 days according to sensitive RT-PCR analysis (Figure 4E), P16 protein was not  
158 detected in these cells according to the insensitive Western blot analysis (Figure 4F).

### 159 **Transcription Silencing of *P16* alleles by Hydroxymethylation**

160 To clarify whether DNA hydroxymethylation or demethylation contributes to *P16*  
161 reactivation, we further analyzed the hydroxymethylation status of *P16* CGIs in cell  
162 subpopulations with strong, weak, and no P16 staining (P16(+), P16(±), and P16(-)) that  
163 were sorted from P16-TET&Dox\_21d H1299 cells (Figure 5A). Interestingly, P16H signal  
164 was detected only in the P16(-) subpopulation, but not in the P16(+) and P16(±)  
165 subpopulations in the TAB-MSP analysis (Figure 5B). TAB sequencing also showed dense  
166 5hmCs among 3 of the 14 clones (21.4%) of the exon-1 AS-strand TAB-PCR products from  
167 the P16(-) subpopulation, with an average hydroxymethylation density of 95.2% for these 3  
168 clones (Figure 5C). The occurrence of 5hmCs in the promoter AS-strand was not detected



169 in the TAB-DHPLC and TAB sequencing results (data not shown).

170 The above results were further confirmed in AGS cells. As described above, P16  
171 protein could not be detected in P16-TET&Dox AGS cells after Dox treatment for 11 days  
172 (Figure 4F). To obtain a P16(+) AGS subpopulation by FACS, the DNA methyltransferase  
173 inhibitor 5-aza-deoxycytidine (DAC, final concentration 20 nmol/L) was used to increase the  
174 P16 protein level within P16-TET AGS cells. In the immunostaining cell analysis, nucleic  
175 P16 protein was detected in 3.5% of P16-TET AGS cells after DAC treatment for 10 days  
176 (P16-TET&DAC\_10d, with baseline P16-TET expression without Dox induction), while  
177 nucleic P16 protein was detected in only 0.5% of the AGS cells treated with DAC alone  
178 (Figure S5). Next, the P16(+), P16( $\pm$ ), and P16(-) subpopulations were sorted from these  
179 P16-TET&DAC\_10d AGS cells (Figure 6A). Once again, the P16H signal was detected  
180 only in the P16(-) subpopulation, and not in the P16(+) and P16( $\pm$ ) cells by the TAB-MSP  
181 and TAB-DHPLC assays (Figures 6B and 6C). In contrast, P16N signal was detected in all  
182 three subpopulations. The TAB sequencing results confirmed this. Dense 5hmCs were  
183 observed in the *P16* exon-1 AS-strand in the P16(-) subpopulation, but not in the P16(+)  
184 subpopulation (Figure 6E).

185 Collectively, the above results indicate that P16H occurs only in P16(-) cells, and not in  
186 P16(+) and P16( $\pm$ ) cells, suggesting that the P16H alleles should be transcriptionally  
187 inactive.

### 188 ***P16* Allele-Dependent Inhibition of Tumor Growth by P16-TET**

189 Although a proliferation difference was not observed between the P16-TET and control  
190 vector, which were stably transfected in H1299 cells *in vitro* (Figure 7A), the average weight  
191 of tumor xenografts of the P16-TET stably transfected cells was significantly lower than that

192 of the control cells in NOD-SCID mice ( $n=8$ ) on the 50<sup>th</sup> post-transplantation day ( $P<0.001$ ,  
193 Figures 7B and 7C). Morphologic differences were not observed between P16-TET and  
194 control vector xenografts (Figure 7D). This result was confirmed in a repeat experiment  
195 (Figure S6A). Meanwhile, this difference could not be observed in xenograft tumors from  
196 lung cancer A549 control cells in which the *P16-P15-P14* alleles were homogeneously  
197 deleted (Figure S6B). These data suggest that P16-TET may specifically inhibit the growth  
198 of cancer cells *in vivo* in a *P16* allele-dependent manner.

199 Although P16-TET did not affect the proliferation of H1299 cells *in vitro*, the results of  
200 the IncuCyte ZOOM wound-scratch and typical transwell assays showed that P16-TET  
201 significantly inhibited H1299 cell migration (Figures S7A and S7B). In a rescue assay, *P16*  
202 siRNA-knockdown significantly reversed the inhibited migration of the P16-TET&Dox  
203 H1299 cells (Figure S7C). These results provide further evidence to support that P16-TET  
204 may inhibit cell migration through *P16* reactivation.

## 205 **DISCUSSION**

206 DNA hydroxymethylomes at the base-resolution level have been analyzed in embryonic  
207 stem cells, adult tissues, and tumors [25-31]. Many functions of DNA hydroxymethylation in  
208 the genome have been illustrated by *TET-1/2/3* knockout studies [5-7,27,31,32]. However,  
209 the actual effect of hydroxymethylation of CGIs on gene transcription remains elusive. In  
210 the present study, we demonstrated that 5hmCs were enriched in the AS-strand of the *P16*  
211 exon-1 CGI. Most importantly, this study showed for the first time that DNA  
212 hydroxymethylation itself could not reactivate *P16* gene transcription. Instead,  
213 hydroxymethylation-mediated active DNA demethylation could reactivate *P16* gene  
214 transcription, which subsequently inhibited the migration and growth of cancer cells *in vivo*.

215 It is well known that an appropriate proportion of 5hmCs in the genome is distributed  
216 with a strand bias [9,28]. We recently reported that there were dense 5hmCs in the *P16*  
217 exon-1 AS-strands in HCT116 cells [21,22]. Based on the comprehensive TAB-DHPLC and  
218 TAB sequencing results, here, we further demonstrated that 5hmCs were enriched only in  
219 the AS-strand of the *P16* exon-1 in HCT116 cells and AGS cells, while sporadic 5hmCs  
220 were detected in the S-strand of *P16* promoter and exon-1 regions. The fact that 88% of the  
221 exon-1 AS-strand CpGs in the wild-type *P16* alleles in HCT116 cells are hydroxymethylated  
222 indicates that *P16* exon-1 has a methylation: hydroxymethylation (M:H) mixture, composed  
223 of a fully hydroxymethylated AS-strand and a truly methylated S-strand.

224 It has been reported that triple knockout of *TET-1/2/3* led to bivalent promoter  
225 hypermethylation in H1 cells [33]. TSSs are DNA replication start sites. S- and AS-strands  
226 of genes are generally replicated by different types of DNA polymerases in eukaryotic cells  
227 (Pol $\delta$  for the leading strand and Pol $\alpha$  for the lagging strand). Unlike true DNA methylation  
228 that is maintained by DNMT1 during DNA synthesis in the S-phase of the cell cycle, DNA  
229 hydroxymethylations are probably maintained by the *de novo* methyltransferases  
230 DNMT3a/b [34]. It is of great interest to study the mechanisms leading to the strand bias of  
231 DNA hydroxymethylation.

232 Three types of epigenetic editing methods, including ZFP-, transcription activator-like  
233 effector (TALE)-, and CRISPR/dCas9-based systems, have emerged as advanced tools to  
234 study the functions of epigenetic modifications [19,35-39]. According to the reported data,  
235 the specificity and efficiency of ZFP-based epigenetic editing tools are likely higher than  
236 those of TALE-based editing tools or CRISPR/dCas9-based editing tools. For example, the  
237 expression controllable ZFP-based *P16*-Dnmt could selectively methylate entire *P16* CGIs

238 around the TSS [19]. However, CRISPR/dCas9-Dnmt3a, combined with *P16*-sgRNA, could  
239 specifically methylate only approximately 50 bp sgRNA target-flanking sequences (not  
240 including the sgRNA target) [40,41]. In contrast, *P16* TALE-Dnmt could methylate the *P16*  
241 target and other CGIs within the *P15-P14-P16-MTAP* gene cluster and repress their  
242 transcription, with low specificity [42]. We recently reported that *ANRIL* expression was  
243 repressed in cancer cells by *P16* methylation [20]. Here, we further demonstrated that the  
244 *ANRIL* expression was upregulated in the *P16*-TET-expressing cells and that the mRNA  
245 levels of *P15* and *P14* were not increased. These observations suggest that *P16*-TET could  
246 specifically demethylate *P16* CGIs via DNA hydroxymethylation and reactivate the  
247 transcription of both the *P16* and *ANRIL* genes, though DNA hydroxymethylation itself  
248 could not reactivate *P16* gene transcription.

249 Recently, we found that all *P16* mRNA clones in the HCT116 cells were transcribed  
250 only from the unmethylated *P16* alleles, and none from the methylated: hydroxymethylated  
251 (M:H) *P16* alleles [21], and that both true *P16M* and *P16H* could similarly increase the risk  
252 for malignant transformation of oral epithelial dysplasia in a prospective study [23]. The  
253 findings of the present study show that the *P16*-TET-induced hydroxymethylation of *P16*  
254 alleles in both H1299 and AGS cells retain transcriptional silence, which provides a  
255 possible mechanism to explain the above observations.

256 There are many differences between cell culture and animal models. Although the  
257 proliferation of H1299 cells that are stably transfected with *P16*-TET was not changed  
258 under *in vitro* culture conditions, the growth of xenograft tumors from these cells was  
259 obviously inhibited in host mice. The exact reasons leading to this difference are unknown;  
260 however, the reactivation of methylated *P16* alleles via DNA demethylation by *P16*-TET

261 may account for the growth inhibition *in vivo*. The growth inhibition of xenograft tumors from  
262 the *P16*-deleted A549 control cells was not observed, suggesting that the growth inhibition  
263 of xenografts by P16-TET may be a *P16*-dependent phenomenon. In the rescue assay,  
264 siRNA knockdown of P16-TET-reactivated *P16* expression almost completely reversed the  
265 inhibition of P16-TET-induced cell migration. This further suggests that the inhibition of the  
266 cancer cell migration by P16-TET may be a *P16*-specific effect.

267 In conclusion, we found that hydroxymethylation of *P16* CGI is located mainly in the  
268 exon-1 AS-strand. P16H alleles are transcriptionally inactive. *P16* demethylation via  
269 hydroxymethylation could reactivate gene transcription and inhibit the growth of cancer  
270 cells.

## 271 **METHODS**

### 272 **Cell Lines and Culture**

273 The colon cancer cell line HCT116 was purchased from the American Type Culture  
274 Collection (ATCC). The GC cell line AGS and the lung cancer cell line H1299 were kindly  
275 provided by Prof. Chengchao Shou from the Peking University Cancer Hospital and  
276 Institute. The colon cancer cell line, RKO was kindly provided by Prof. Guoren Deng from  
277 the University of California, San Francisco. These cells were cultured in RPMI 1640  
278 containing 10% FBS and 100 U/mL penicillin/streptomycin (Invitrogen, California, USA) at  
279 37°C in a humidified incubator with 5% CO<sub>2</sub>.

280 These cell lines were tested and authenticated by Beijing JianLian Genes Technology  
281 Co., LTD before they were used in this study. STR patterns were analyzed using a  
282 Goldeneye™20A STR Identifiler PCR Amplification Kit. Gene Mapper v3.2 software (ABI)

283 was used to match the STR pattern with the ATCC online databases.

#### 284 **Characterization of 5mC and 5hmC Sites in *P16* CGIs**

285 Total P16M was analyzed using 150-bp regular methylation-specific PCR (MSP) [43]. To  
286 selectively detect P16H, the genomic DNA (3  $\mu$ g), spiked with *M.sssl*-methylated and  
287 5hmC-containing  $\lambda$ -DNA controls, was modified using the TET-Assisted Bisulfite (TAB) Kit,  
288 according to manufacturer's instructions (WiseGene, Cat# K001). During TAB-modification,  
289 5mC was oxidized to 5caC, and both 5caC and unmethylated cytosine were subsequently  
290 converted to uracil through bisulfite-induced deamination, whereas 5hmC was protected  
291 from oxidation via 5hmC-specific  $\beta$ -glucosylation [25]. The conversion rates of  
292 unmethylated cytosine, 5mCs, and 5hmCs in the bisulfite-/TAB-treated  $\lambda$ -DNA controls  
293 were 100%, 99.7%, and 1.5%, respectively (Figure S1). P16H was analyzed using the  
294 TAB-MSP.

295 The proportion of hydroxymethylated S- and AS-strands of the *P16* promoter and  
296 exon-1 CGIs were analyzed using DHPLC and clone sequencing, respectively [45,46]. The  
297 adjusted ratio of the peak height for the hydroxymethylated region to that of the  
298 unmethylated region was used to represent the P16H proportion that was adjusted. The  
299 ratio of the P16M peak height to the P16U peak height for *P16*-hemimethylated HCT116  
300 cells was used as a reference. The sequences of the universal primers used to amplify  
301 these fragments are listed in Table 1.

#### 302 **Construction of Expression Vectors and Transfection**

303 To construct the *P16*-specific DNA dioxygenase (P16-TET) expression vector, an SP1-like  
304 engineered seven-zinc finger protein (7ZFP-6I) [19] that can specifically bind to the 21-bp

305 fragment (5'-gaggaaggaacggggcgggg-3', including an Sp1-binding site) within the human  
306 *P16* core promoter [24,47], was fused with the catalytic domain (CD: 1418-2136 aa) of  
307 human *TET1* (NM\_030625.2) [48] and inserted into a pcDNA3.1b vector and then used in  
308 transient transfection assays. An inactive P16-TET mutant containing an H1671Y mutation  
309 in the CD domain vector was also constructed and used as a negative control vector  
310 (Figure S2A). The P16-TET sequence was further integrated into the  
311 expression-controllable pTRIPZ vector carrying a "Tet-on" switch (Open Biosystem, USA)  
312 (Figure S2B) [19]. Purified P16-TET pTRIPZ plasmid was mixed with VSVG and  $\Delta 8.9$   
313 (Addgene, USA) to prepare lentivirus transfection particles. The fresh lentivirus particles  
314 were used to stably infect AGS and H1299 cells containing homogenously methylated *P16*  
315 CpG islands. Doxycycline (Dox; final conc. 0.25  $\mu\text{g}/\text{mL}$ ) was added to the medium to induce  
316 P16-TET expression.

317 Two *P16*-specific siRNAs (5'-ccgua aaugu ccauu uauatt-3' and 5'-uauaa augga cauuu  
318 acggtt-3') were synthesized (GenePharma, Shanghai) and used to transiently transfect  
319 cells at a final concentration of 1.0  $\mu\text{g}/\text{mL}$ . Two scrambled siRNAs (5'-uucuc cgaac guguc  
320 acgutt-3' and 5'-acgug acacg uucgg agaatt-3') were used as negative controls (NC).

### 321 **Treatment of 5'-Aza-Deoxycytidine (DAC)**

322 The AGS cells were treated with DAC (final concentration 20 nM; Abcam ab120842,  
323 Cambridge, UK) for 7 days in the P16-immunostaining assay or 10 days prior to FACS  
324 sorting.

### 325 **Extraction of RNA and Quantitative RT-PCR (qRT-PCR)**

326 Cells were harvested when they reached a confluency of approximately 70%. Total RNA  
327 was extracted by TRIzol (Invitrogen, California, USA). The cDNA was reverse-transcribed

328 using the ImProm-II<sup>TM</sup> Reverse Transcription System (A3800; Promega). The expression  
329 levels of the *ANRIL*, *P16*, *P15*, *P14*, and *TET-1/2/3* genes were analyzed by quantitative  
330 RT-PCR using the corresponding primer sets (Table 1), as previously described [20]. Power  
331 SYBR Green PCR Master Mix (Fermentas, Canada) was used in the qRT-PCR analyses  
332 (ABI-7500FAST). The relative mRNA level was calculated based on the average Ct value of  
333 the target gene and the *Alu* reference [ $2^{-(Ct_{\text{target\_gene}} - Ct_{\text{Alu}})}$ ] [49].

### 334 **Western Blot and Confocal Microscopy Analysis of the P16 Expression Status**

335 The *P16* mRNA and protein levels in the cells were analyzed as previously described [19].  
336 Rabbit monoclonal antibody against human P16 protein (ab108349, Abcam, Britain) was  
337 used in the Western blot assay, and mouse monoclonal antibody against the human P16  
338 protein (Ventana Roche-E6H4, USA) was used in the immunostaining assay.

### 339 **Cell FACS Sorting**

340 The P16-TET stably transfected H1299 cells (treated with doxycycline for 21 days) and  
341 AGS cells (treated with 5-aza-deoxycytidine for 10 days) were fixed with methanol,  
342 permeabilized with 0.1% Tween-20 in PBS, pretreated with 10% fetal bovine serum and 0.3  
343 M glycine in PBS, and were then stained with the mouse monoclonal antibody against the  
344 human P16 protein (Ventana Roche-E6H4, USA) and the FITC-tagged secondary antibody.  
345 The P16-staining cell population proportion was determined using an immuno-fluorescence  
346 confocal microscope. These cells were sorted by FACS and divided into three  
347 subpopulations, strong-, weak-, and non-P16-staining, using P16-TET H1299 cells without  
348 doxycycline treatment or AGS cells without DAC treatment as P16 protein negative controls.  
349 According to the confocal analysis results, we setup the cutoff value to sort definite and  
350 indefinite P16 protein positive (P16(+)) and P16(±) cell subpopulations. The strong and



351 weak FITC-staining cells were called as the P16(+) and P16(±) subpopulations,  
352 respectively.

### 353 **IncuCyte ZOOM and Transwell Migration Tests**

354 The long-term live content kinetic imaging platform (IncuCyte Zoom, Essen BioSci, USA)  
355 was used to dynamically detect the proliferation and migration of live cancer cells. The  
356 phase object confluence (%) was used to generate a cell proliferation curve. The relative  
357 wound density, a measure (%) of the density of the wound region relative to the density of  
358 the cell region, was used as the metric for cell migration. The transwell migration test was  
359 performed as previously described [19].

### 360 **Xenografts in SCID Mice**

361 Cells stably transfected with the P16-TET vector were induced with 0.25 µg/mL doxycycline  
362 for 7 days and then subcutaneously injected into one lower limb of each NOD-SCID mouse  
363 ( $10^5$  cells/injection; female, 5 weeks old, 10~20 g, purchased from Beijing Huafukang  
364 Biotech). The negative control cells stably transfected with the empty pTRIPZ vector were  
365 simultaneously injected into the opposite side of each mouse. These mice were given  
366 distilled, sterile water containing 2 µg/mL doxycycline and were sacrificed on the 50<sup>th</sup>  
367 post-transplantation day. The xenografts were weighed and histologically confirmed [19].  
368 Two repeat experiments were performed.

### 369 **Statistical Analysis**

370 Student's t-test was used for statistical analysis. All *P*-values were two-sided, and a *P*-value  
371 of <0.05 was considered to be statistically significant.

## 372 **ACKNOWLEDGEMENTS**

373 We thank Mr. Jordan M. Grainger (Predoctoral student, Molecular Pharmacology and  
374 Experimental Therapeutics, Mayo Clinic, Rochester, Minnesota, USA) and Dr. Huidong Shi  
375 (Cancer Center, Georgia Medical College, Augusta, USA) for English language editing.

## 376 **Ethics approval and consent to participate**

377 The Peking University Cancer Hospital and Institutional Review Boards approved this study.  
378 Ethical approval for the animal experiments was obtained.

## 379 **Disclosure of potential conflicts of interest**

380 The authors have declared that no competing interests exist.

## 381 **REFERENCES**

- 382 [1] Tahiliani M, Koh KP, Shen Y, Pastor WA, Bandukwala H, Brudno Y, *et al.* Conversion  
383 of 5-methylcytosine to 5-hydroxymethylcytosine in mammalian DNA by MLL partner  
384 TET1. *Science* 2009; 324: 930-935.
- 385 [2] Kriaucionis S, Heintz N. The nuclear DNA base 5-hydroxymethylcytosine is present  
386 in Purkinje neurons and the brain. *Science* 2009; 324: 929-930.
- 387 [3] He YF, Li BZ, Li Z, Liu P, Wang Y, Tang Q, *et al.* Tet-mediated formation of  
388 5-carboxylcytosine and its excision by TDG in mammalian DNA. *Science* 2011; 333:  
389 1303-1307.
- 390 [4] Ito S, Shen L, Dai Q, Wu SC, Collins LB, Swenberg JA, *et al.* Tet proteins can  
391 convert 5-methylcytosine to 5-formylcytosine and 5-carboxylcytosine. *Science* 2011;  
392 333: 1300-1303.
- 393 [5] Gu TP, Guo F, Yang H, Wu HP, Xu GF, Liu W, *et al.* The role of Tet3 DNA  
394 dioxygenase in epigenetic reprogramming by oocytes. *Nature* 2011; 477: 606-610.

- 395 [6] Hackett JA, Sengupta R, Zylicz JJ, Murakami K, Lee C, Down TA, *et al.* Germline  
396 DNA demethylation dynamics and imprint erasure through 5-hydroxymethylcytosine.  
397 Science 2013; 339: 448-452.
- 398 [7] Pastor WA, Pape UJ, Huang Y, Henderson HR, Lister R, Ko M, *et al.* Genome-wide  
399 mapping of 5-hydroxymethylcytosine in embryonic stem cells. Nature 2011;473:394-7
- 400 [8] Ficiz G, Branco MR, Seisenberger S, Santos F, Krueger F, Hore TA, *et al.* Dynamic  
401 regulation of 5-hydroxymethylcytosine in mouse ES cells and during differentiation.  
402 Nature 2011; 473: 398-402.
- 403 [9] Yu M, Hon GC, Szulwach KE, Song CX, Zhang L, Kim A, *et al.* Base-resolution analysis  
404 of 5-hydroxymethylcytosine in the mammalian genome. Cell 2012; 149: 1368-1380.
- 405 [10] Merlo A, Herman JG, Mao L, Lee DJ, Gabrielson E, Burger PC, *et al.* 5' CpG island  
406 methylation is associated with transcriptional silencing of the tumor-suppressor  
407 p16/cdkn2/mts1 in human cancers. Nature Medicine 1995; 1: 686-692.
- 408 [11] Herman JG, Merlo A, Mao L, Lapidus RG, Issa JPJ, Davidson NE, *et al.* Inactivation of  
409 the cdkn2/p16/mts1 gene is frequently associated with aberrant dna methylation in all  
410 common human cancers. Cancer Research 1995; 55: 4525-4530.
- 411 [12] Sun Y, Deng DJ, You WC, Bai H, Zhang L, Zhou J, *et al.* Methylation of p16 CpG islands  
412 associated with malignant transformation of gastric dysplasia in a population-based  
413 study. Clinical Cancer Research 2004; 10: 5087-5093.
- 414 [13] Belinsky SA, Liechty KC, Gentry FD, Wolf HJ, Rogers J, Vu K, *et al.* Promoter  
415 hypermethylation of multiple genes in sputum precedes lung cancer incidence in a  
416 high-risk cohort. Cancer Res 2006; 66: 3338-3344.
- 417 [14] Hall GL, Shaw RJ, Field EA, Rogers SN, Sutton DN, Woolgar JA, *et al.* p16 Promoter

- 418 methylation is a potential predictor of malignant transformation in oral epithelial  
419 dysplasia. *Cancer Epidemiol Biomarkers Prev* 2008; 17: 2174-2179.
- 420 [15] Cao J, Zhou J, Gao Y, Gu L, Meng H, Liu H, *et al.* Methylation of p16 CpG Island  
421 Associated with Malignant Progression of Oral Epithelial Dysplasia: A Prospective  
422 Cohort Study. *Clinical Cancer Research* 2009; 15: 5178-5183.
- 423 [16] Jin Z, Cheng Y, Gu W, Zheng Y, Sato F, Mori Y, *et al.* A multicenter, double-blinded  
424 validation study of methylation biomarkers for progression prediction in Barrett's  
425 esophagus. *Cancer Res* 2009; 69: 4112-4115.
- 426 [17] Liu HW, Liu XW, Dong GY, Zhou J, Liu Y, Gao Y, *et al.* P16 Methylation as an Early  
427 Predictor for Cancer Development From Oral Epithelial Dysplasia: A Double-blind  
428 Multicentre Prospective Study. *EBioMedicine* 2015; 2: 432-437.
- 429 [18] Gao H-e, Zhang Y, Zhou J, Li Z, Ma J-l, Liu W-d, *et al.* Association between  
430 p16 methylation and malignant transformation of gastric dysplasia. *Chinese Journal of*  
431 *Cancer Prevention and Treatment* 2017; 24: 431-436.
- 432 [19] Cui C, Gan Y, Gu L, Wilson J, Liu Z, Zhang B, *et al.* P16-specific DNA methylation by  
433 engineered zinc finger methyltransferase inactivates gene transcription and promotes  
434 cancer metastasis. *Genome Biology* 2015; 16: 252.
- 435 [20] Gan Y, Ma W, Wang X, Qiao J, Zhang B, Cui C, *et al.* Coordinate Transcription of  
436 *ANRIL* and *P16* Genes Silenced by DNA Methylation. *Chinese Journal of Cancer*  
437 *Research* 2018; 30: 93-103.
- 438 [21] Qin SS, Li Q, Zhou J, Liu ZJ, Su N, Wilson J, *et al.* Homeostatic Maintenance of  
439 Allele-Specific p16 Methylation in Cancer Cells Accompanied by Dynamic Focal  
440 Methylation and Hydroxymethylation. *Plos One* 2014; 9: E97785.

- 441 [22] Qin S, Zhang B, Tian W, Gu L, Lu Z, Deng D. Kaiso mainly locates in the nucleus in vivo  
442 and binds to methylated, but not hydroxymethylated DNA. Chinese Journal of Cancer  
443 Research 2015; 27: 148-155.
- 444 [23] Liu HW, Liu ZJ, Liu XW, Xu S, Wang L, Liu Y, *et al.* A similar effect of *P16*  
445 hydroxymethylation and true-methylation on the prediction of malignant transformation  
446 of oral epithelial dysplasia: observation from a prospective study. BMC Cancer 2018;  
447 18:918.
- 448 [24] Zhang B, Xiang S, Zhong Q, Yin Y, Gu L, Deng D. The p16-Specific Reactivation and  
449 Inhibition of Cell Migration Through Demethylation of CpG Islands by Engineered  
450 Transcription Factors. Human Gene Therapy 2012; 23: 1071-1081.
- 451 [25] Sun Z, Terragni J, Jolyon T, Borgaro JG, Liu Y, Yu L, *et al.* High-resolution enzymatic  
452 mapping of genomic 5-hydroxymethylcytosine in mouse embryonic stem cells. Cell  
453 Rep 2013; 3: 567-576.
- 454 [26] Wang T, Wu H, Li Y, Szulwach KE, Lin L, Li X, *et al.* Subtelomeric hotspots of  
455 aberrant 5-hydroxymethylcytosine-mediated epigenetic modifications during  
456 reprogramming to pluripotency. Nat Cell Biol 2013; 15: 700-711.
- 457 [27] Kim M, Park YK, Kang TW, Lee SH, Rhee YH, Park JL, *et al.* Dynamic changes in  
458 DNA methylation and hydroxymethylation when hES cells undergo differentiation  
459 toward a neuronal lineage. Hum Mol Genet 2014; 23: 657-667.
- 460 [28] Wen L, Li X, Yan L, Tan Y, Li R, Zhao Y, *et al.* Whole-genome analysis of  
461 5-hydroxymethylcytosine and 5-methylcytosine at base resolution in the human  
462 brain. Genome Biol 2014; 15: R49.
- 463 [29] Chen K, Zhang J, Guo Z, Ma Q, Xu Z, Zhou Y, *et al.* Loss of  
464 5-hydroxymethylcytosine is linked to gene body hypermethylation in kidney cancer.  
465 Cell Res 2016; 26: 103-118.

- 466 [30] Li X, Liu Y, Salz T, Hansen KD, Feinberg A. Whole-genome analysis of the  
467 methylome and hydroxymethylome in normal and malignant lung and liver. *Genome*  
468 *Res* 2016; 26: 1730-1741.
- 469 [31] Huang Y, Chavez L, Chang X, Wang X, Pastor WA, Kang J, *et al.* Distinct roles of the  
470 methylcytosine oxidases Tet1 and Tet2 in mouse embryonic stem cells. *Proc Natl Acad*  
471 *Sci U S A* 2014; 111: 1361-1366.
- 472 [32] Uribe-Lewis S, Stark R, Carroll T, Dunning MJ, Bachman M, Ito Y, *et*  
473 *al.* 5-hydroxymethylcytosine marks promoters in colon that resist DNA hypermethylation  
474 in cancer. *Genome Biol* 2015; 16: 69.
- 475 [33] Verma N, Pan H, Doré LC, Shukla A, Li QV, Pelham-Webb B, *et al.* TET proteins  
476 safeguard bivalent promoters from de novo methylation in human embryonic stem cells.  
477 *Nat Genet* 2018; 50: 83-95.
- 478 [34] Hashimoto H, Liu Y, Upadhyay AK, Chang Y, Howerton SB, Vertino PM, *et al.*  
479 Recognition and potential mechanisms for replication and erasure of cytosine  
480 hydroxymethylation. *Nucleic Acids Res* 2012; 40: 4841-4849.
- 481 [35] Liu XS, Wu H, Ji X, Stelzer Y, Wu X, Czauderna S, *et al.* Editing DNA Methylation in the  
482 Mammalian Genome. *Cell* 2016; 167: 233-247.
- 483 [36] Kearns NA, Pham H, Tabak B, Genga RM, Silverstein NJ, Garber M, *et al.* Functional  
484 annotation of native enhancers with a Cas9-histone demethylase fusion. *Nat*  
485 *Methods* 2015; 12: 401-403.
- 486 [37] Lei Y, Zhang X, Su J, Jeong M, Gundry MC, Huang YH, *et al.* Targeted DNA  
487 methylation in vivo using an engineered dCas9-MQ1 fusion protein. *Nat*  
488 *Commun* 2017; 8: 16026.
- 489 [38] Konermann S, Brigham MD, Trevino A, Hsu PD, Heidenreich M, Cong L, *et al.* Optical

- 490 control of mammalian endogenous transcription and epigenetic states. *Nature* 2013;  
491 500: 472-476.
- 492 [39] Maeder ML, Angstman JF, Richardson ME, Linder SJ, Cascio VM, Tsai SQ, *et al.*  
493 *Targeted DNA demethylation and activation of endogenous genes using*  
494 *programmable TALE-TET1 fusion proteins. Nat Biotechnol* 2013; 31: 1137-1142.
- 495 [40] McDonald JI, Celik H, Rois LE, Fishberger G, Fowler T, Rees R, *et al.* Reprogrammable  
496 CRISPR/Cas9-based system for inducing site-specific DNA methylation. *Biol*  
497 *Open* 2016; 5: 866-874.
- 498 [41] Saunderson EA, Stepper P, Gomm JJ, Hoa L, Morgan A, Allen MD, *et al.* Hit-and-run  
499 epigenetic editing prevents senescence entry in primary breast cells from healthy  
500 donors. *Nat Commun* 2017; 8: 1450.
- 501 [42] Bernstein DL, Le Lay JE, Ruano EG, Kaestner KH. TALE-mediated epigenetic  
502 suppression of CDKN2A increases replication in human fibroblasts. *J Clin Invest* 2015;  
503 125: 1998-2006.
- 504 [43] Herman JG, Graff JR, Myöhänen S, Nelkin BD, Baylin SB. Methylation-specific PCR: a  
505 novel PCR assay for methylation status of CpG islands. *Proc Natl Acad Sci U S A* 1996;  
506 93: 9821-9826.
- 507 [44] Yu M, Hon GC, Szulwach KE, Song CX, Jin P, Ren B, *et al.* Tet-assisted bisulfite  
508 sequencing of 5-hydroxymethylcytosine. *Nat Protoc* 2012; 7: 2159-2170.
- 509 [45] Deng DJ, Deng GR, Smith MF, Zhou J, Xin HJ, Powell SM, *et al.* Simultaneous  
510 detection of CpG methylation and single nucleotide polymorphism by denaturing high  
511 performance liquid chromatography. *Nucleic Acids Research* 2002; 30: 13E.
- 512 [46] Luo DY, Zhang BZ, Lv LB, Xiang SY, Liu YH, Ji JF, *et al.* Methylation of CpG islands of

513 p16 associated with progression of primary gastric carcinomas. Laboratory  
514 Investigation 2006; 86: 591-598.  
515 [47] Zhang B, Xiang S, Yin Y, Gu L, Deng D. C-terminal in Sp1-like artificial zinc-finger  
516 proteins plays crucial roles in determining their DNA binding affinity. BMC  
517 Biotechnology 2013; 13: 106.  
518 [48] Guo JU, Su Y, Zhong C, Ming GL, Song H. Hydroxylation of 5-methylcytosine by TET1  
519 promotes active DNA demethylation in the adult brain. Cell 2011; 145: 423-434.  
520 [49] Zheng X, Zhou J, Zhang B, Zhang J, Wilson J, Gu L, *et al.* Critical evaluation of Cbx7  
521 downregulation in primary colon carcinomas and its clinical significance in Chinese  
522 patients. BMC cancer 2015; 15: 1172.

## 523 **FIGURE LEGENDS**

524 **Figure 1.** TAB-DHPLC and TAB sequencing detected 5hmCs in the sense- and  
525 antisense-strands of *P16* promoter and exon-1 of HCT116 cells. (**A-D**) Results of four  
526 amplicons in the sense- and antisense-strands of the *P16* promoter and exon-1 regions are  
527 illustrated in the middle chart; Left charts: chromatograms of bisulfite- and TAB-PCR  
528 products for four strands. P16M Ctrl and P16U Ctrl: the corresponding PCR products of  
529 *P16*-methylated RKO cells and *P16*-unmethylated MGC803 cells; Right images: Results of  
530 clone sequencing of HCT116\_TAB PCR products for four strands. 5hmC density: 82.9%  
531 (290/350) and 17.6% (58/330) for wildtype exon-1 antisense- and sense-strand clones, and  
532 2.0% (5/250) and 22.3% (58/260) for promoter antisense- and sense-strand clones. Each  
533 line represents one clone, respectively. Each red dot represents one 5hmC. Green dots  
534 indicate TAB-unmodified cytosines. The locations of G-insertion and G-deletion in exon-1  
535 are also labeled. The amplicon sequences of four strands are placed at the top of the



536 images. M:U and H:N, ratios of the peak height for Methylated-*P16* to Un-methylated-*P16*  
537 alleles and Hydroxymethylated-*P16* to Not hydroxymethylated-*P16* alleles in  
538 bisulfite-DHPLC and TAB-DHPLC analyses, respectively.

539 **Figure 2.** Reactivation of methylated *P16* alleles in H1299 cells 6 days after P16-TET  
540 transient transfection. **(A)** qRT-PCR. **(B)** Immunofluorescence staining.

541 **Figure 3.** P16-TET induces hydroxymethylation of *P16* CpG islands and reactivates  
542 expression of methylated *P16* alleles in H1299 cells. **(A)** TAB-MSP analysis for detecting  
543 hydroxymethylated (H)- and nonhydroxymethylated (N)-*P16* CpG alleles in H1299 cells  
544 stably transfected with P16-TET or empty control vector after doxycycline treatment. The  
545 MSP analysis results were also listed. Genomic DNA from RKO and BGC832 cells was  
546 used as P16M and P16U controls in the MSP assays, respectively. **(B)** Western blot  
547 analysis for detecting the P16 protein; Dox (+/-): with or without the doxycycline treatment  
548 (final conc. 0.25 µg/mL). Proteins from BGC832 cells were used as a P16U/active control.  
549 **(C)** qRT-PCR results for detecting *P16* mRNA levels relative to *Alu* RNA levels; **(D)**  
550 Immunofluorescence confocal analysis for detecting P16 expression.

551 **Figure 4.** P16-TET induces hydroxymethylation of *P16* CpG islands and reactivates  
552 expression of methylated-*P16* alleles in AGS cells. **(A)** Bisulfite-DHPLC analysis for  
553 detecting methylated-*P16* (P16M) and unmethylated-*P16* (P16U) PCR products for the  
554 exon-1 antisense strand in P16-TET-transfected AGS cells with different doxycycline  
555 induction times. **(B)** The TAB-DHPLC analysis detected the hydroxymethylated *P16* (P16H)  
556 PCR products and nonhydroxymethylated *P16* (P16N) PCR products. **(C and D)** Bisulfite  
557 and TAB sequencing for detecting 5mC and 5hmC sites, respectively, in the same PCR

558 products as were analyzed by DHPLC. (E and F) The results of RT-PCR and Western blot  
559 analysis for detecting P16 reactivation in AGS cells.

560 **Figure 5.** Characterization of P16H in FACS-sorted subpopulations of H1299 cells with  
561 various levels of of *P16* expression reactivation. (A) FACS sorting of P16-TET stably  
562 transfected H1299 cells with and without Dox treatment. The confocal images of the P16  
563 protein staining status are also attached. (B) Detection of the DNA hydroxymethylation  
564 status of *P16* alleles in various FACS-sorted H1299 subpopulations with strong, weak, and  
565 no P16 immunostaining (P16(+)/(±)/(-)) in the TAB-MSP analysis. (C) The results of TAB  
566 sequencing for the *P16* CpG islands in the P16-negative subpopulation.

567 **Figure 6.** Characterization of P16H in FACS-sorted subpopulations of AGS cells with  
568 various levels of *P16* expression reactivation. (A) FACS-sorting of P16-TET stably  
569 transfected AGS cells with and without DAC treatment. The confocal images of the P16  
570 protein staining status are also attached. (B) Detection of the DNA hydroxymethylation  
571 status of *P16* alleles in various FACS sorted AGS subpopulations with strong, weak, and no  
572 P16-immunostaining (P16(+)/(±)/(-)) in the TAB-MSP analysis. (C) The results of  
573 TAB-DHPLC for the *P16* CpG islands in three subpopulations. (D) The results of TAB  
574 sequencing for the antisense strand of *P16* exon-1 in P16(+) and P16(-) subpopulations.

575 **Figure 7.** Effects of P16H on the proliferation of H1299 cells *in vitro* and *in vivo*. (A) Cell  
576 proliferation curves for H1299 cells with and without P16-TET expression in a live content  
577 kinetic imaging platform; (B) Comparison of weights of H1299 tumor xenografts with and  
578 without stable P16-TET transfection in SCID mice; (C and D) Images of xenografts on the  
579 50<sup>th</sup> experimental day.

## 580 SUPPORTING FIGURE LEGENDS

581 **Figure S1.** Characterization of the true methylation and hydroxymethylation states of CpG  
582 sites in the *M.sssl*-methylated and 5hmC-containing  $\lambda$ -DNA controls (5mC-ctrl and  
583 5hmC-ctrl). Bisulfite-modified DNA templates were used to discriminate 5mC or 5hmC from  
584 unmethylated cytosine. TAB-modified DNA templates were used to discriminate 5hmC from  
585 5mC and unmethylated cytosine. The CpG sites within the consensus sequences are listed  
586 above the corresponding clone sequences. The number of 5hmC and 5mC sites within  
587 each clone is also listed on the right side. The control DNA was added into the test samples  
588 to monitor the conversion status of 5mC, 5hmC, and unmethylated cytosine in genomic  
589 DNA by bisulfite and TAB treatments.

590 **Figure S2.** Construction of P16-TET expression vector. (A) Fragment sequences of the  
591 catalytic domain (CD) of the human *TET1* gene were used to construct the wild-type  
592 P16-TET and its inactive H1671Y-mutant control. (B) The pTRIPZ vector integrated with  
593 7ZFP-6l and the TET1 CD domain.

594 **Figure S3.** The demethylation status of *P16* CpG islands and reactivation of *P16*  
595 expression in H1299 cells. (A) Bisulfite-DHPLC analysis for detecting methylated- and  
596 demethylated-*P16* (P16-M and P16-U) in H1299 cells stably transfected with P16-TET or  
597 empty control vector after doxycycline treatment for different days; genomic DNA from  
598 HCT116 cells was used as a P16-M and P16-U control. (B) Bisulfite sequencing analysis  
599 for detecting the methylation status of *P16* exon-1 antisense strands from H1299 cells  
600 stably transfected with P16-TET and doxycycline-treated for 0, 14, and 28 days.

601 **Figure S4.** Effect of P16-TET on transcription of *P16*, *ANRIL*, *P15*, and *P14* genes in the  
602 9p21 locus of H1299 cells stably transfected with the P16-TET pTRIPZ vector and treated  
603 with doxycycline for 14 days.

604 **Figure S5.** P16 expression status of *P16*-methylated AGS cells stably transfected with  
605 P16-TET (or control vector) as shown by immunostaining. P16-TET cells were cotreated  
606 with 5-aza-deoxycytidine (DAC, final concentration 20 nM) or its reagent control for 10 days  
607 (without doxycycline treatment). The proportion of P16(+) cells in the confocal microscopy  
608 images for each group was automatically counted using the ImageXpress Micro High  
609 Content Screening System (Molecular Devices, USA).

610 **Figure S6.** Effects of P16-H on the growth of xenograft tumors from H1299 and A549 cells  
611 in NOD-SCID mice. **(A)** Images of xenograft tumors from H1299 cells with and without  
612 stable P16-TET transfection on the 36<sup>th</sup> experimental day. **(B)** Images of xenograft tumors  
613 from *ink4a/b*-deleted A549 cells with and without stable P16-TET transfection on the 33<sup>rd</sup>  
614 experimental day. The H.E. staining images are also displayed.

615 **Figure S7.** Effects of *P16* expression changes induced by P16-TET and *P16* siRNA on the  
616 migration of H1299 cells stably transfected with P16-TET *in vitro*. **(A)** IncuCyte ZOOM  
617 scratch assay for detecting cell migration. **(B)** Transwell migration assay for detecting the  
618 migration of cells with 24 hr incubation. The average cell number (confluence) and s.d.  
619 value are displayed in the left charts. **(C)** Rescue assay for detecting the effect of  
620 siRNA-knockdown of *P16* expression on the migration of H1299 cells stably transfected  
621 with P16-TET and treated with doxycycline for 14 days. The cells ( $4.5 \times 10^4$ ) transiently  
622 transfected with two types of *P16*-specific siRNAs were seeded into each well and

623 incubated for 72 hrs. The expression status of the P16 protein was monitored using  
624 Western blot assay.  
625

626 **TABLE**

627 **Table 1.** Sequences of oligonucleotides used as primers in various PCR-based assays

| Gene name    | Entrez gene ID | Assay        | Oligo name | Primer sequence (5'→3')      | Product size (bp) | PCR Tm (°C)             |     |    |
|--------------|----------------|--------------|------------|------------------------------|-------------------|-------------------------|-----|----|
| <i>P16</i>   | 1029           | qRT-PCR      | P16-F      | gctgcccaacgcaccgaata         | 180               | 58                      |     |    |
|              |                |              | P16-R      | accaccagcgtgtccaggaa         |                   |                         |     |    |
|              |                | DHPLC/Seq    | P16-E1F    | tttttagaggatttgaggatagg      | 392               | 57                      |     |    |
|              |                |              | P16-E1R    | ctacctaatccaattcccctacaaactt |                   |                         |     |    |
|              |                |              | P16-E1SF   | gtttagattttttatttttgat       |                   |                         | 369 | 56 |
|              |                |              | P16-E1SR   | tccccttacctaaaaataacc        |                   |                         |     |    |
|              |                |              | P16-PF     | ttgtagttaggaaggtgtat         |                   |                         | 367 | 55 |
|              |                |              | P16-PR     | ttagaggatttgaggatagg         |                   |                         |     |    |
|              |                | MSP-M/H      | P16-MF     | ttattagagggtggggcggatcgc     | 150               | 62                      |     |    |
|              |                |              | P16-MR     | gaccccgaaaccgacccgtaa        |                   |                         |     |    |
|              |                | MSP-U/N      | P16-UF     | ttattagagggtgggggtgattgt     | 151               | 62                      |     |    |
|              |                |              | P16-UR     | caaccccaaaccacaaccataa       |                   |                         |     |    |
|              |                | <i>ANRIL</i> | NR_003529  | qRT-PCR                      | E3-E4R            | cagcagaaggtgggcagcagat  | 145 | 64 |
|              |                |              |            |                              | E3-E4F            | ttcctcgacagggcagggcaggt |     |    |
| <i>P15</i>   | 1030           | qRT-PCR      | P15-qF     | agtcaaccgttcgggagggc         | 168               | 58                      |     |    |
|              |                |              | P15-qR     | accaccagcgtgtccaggaa         |                   |                         |     |    |
| <i>P14</i>   | 1029           | qRT-PCR      | P14-qF     | gccagggcgcccgcgctg           | 236               | 62                      |     |    |
|              |                |              | P14-qR     | ggcccgtgcagcaccacca          |                   |                         |     |    |
| <i>ALU</i>   |                | qRT-PCR      | ALU-qF     | gaggctgaggcaggagaatcg        |                   | 54                      |     |    |
|              |                |              | ALU-qR     | gtcggccaggctggagt            |                   |                         |     |    |
| <i>GAPDH</i> | 2597           | (q)RT-PCR    | GAPDH-F    | gaaggtgaaggtcggagt           | 226               | 62                      |     |    |
|              |                |              | GAPDH-R    | gaagatggtgatggatttc          |                   |                         |     |    |
| <i>λ-DNA</i> | 5hmC-ctrl      | PCR          | 5hmC-F     | ggagttggtatgtaggtagaaagg     | 202               | 55                      |     |    |
|              |                |              | 5hmC-R     | attcactctctcacctactctct      |                   |                         |     |    |
|              | 5mC-ctrl       | PCR          | 5mC-F      | ttgggtatgtaagttgatttatg      | 296               | 55                      |     |    |
|              |                |              | 5mC-R      | caccctactactaaaatttacacc     |                   |                         |     |    |

628

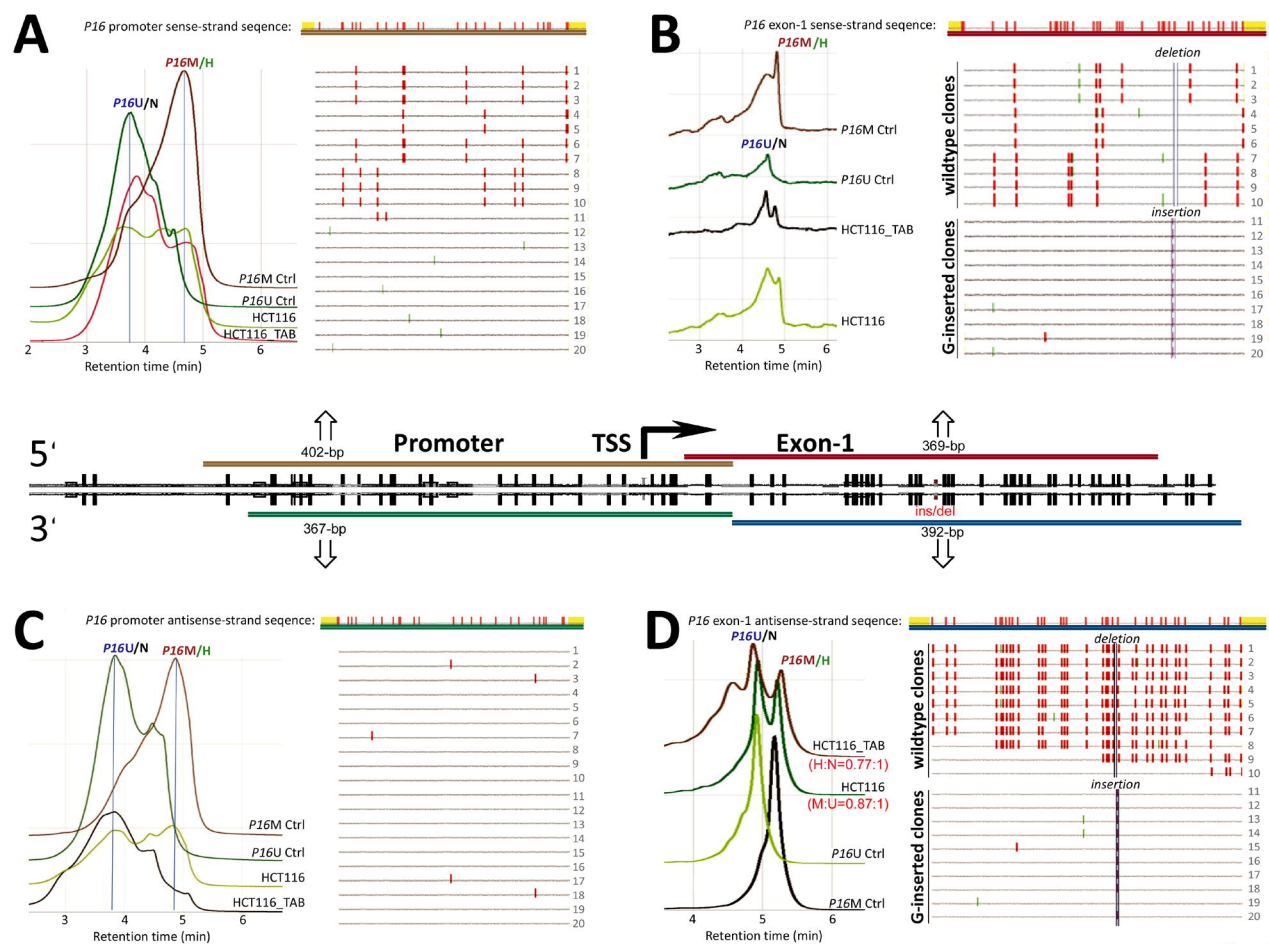

**Fig.1**

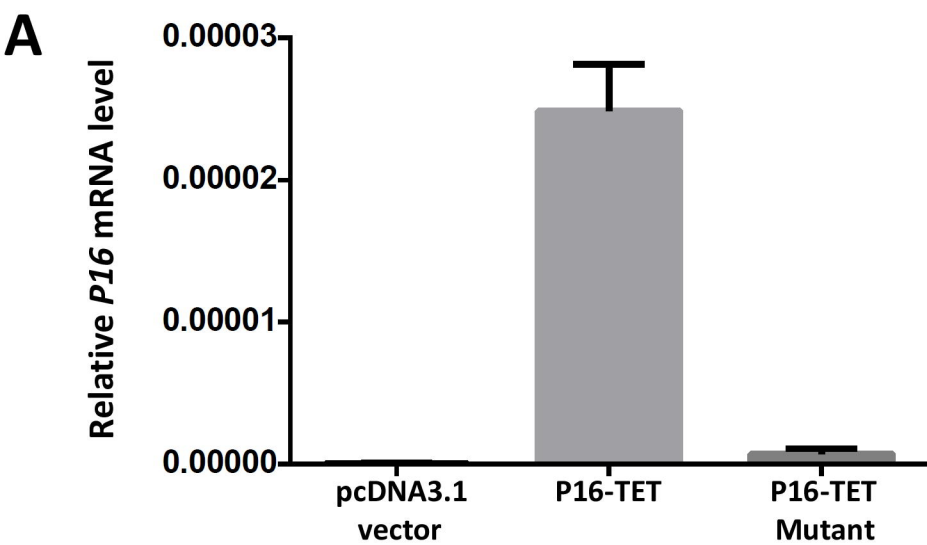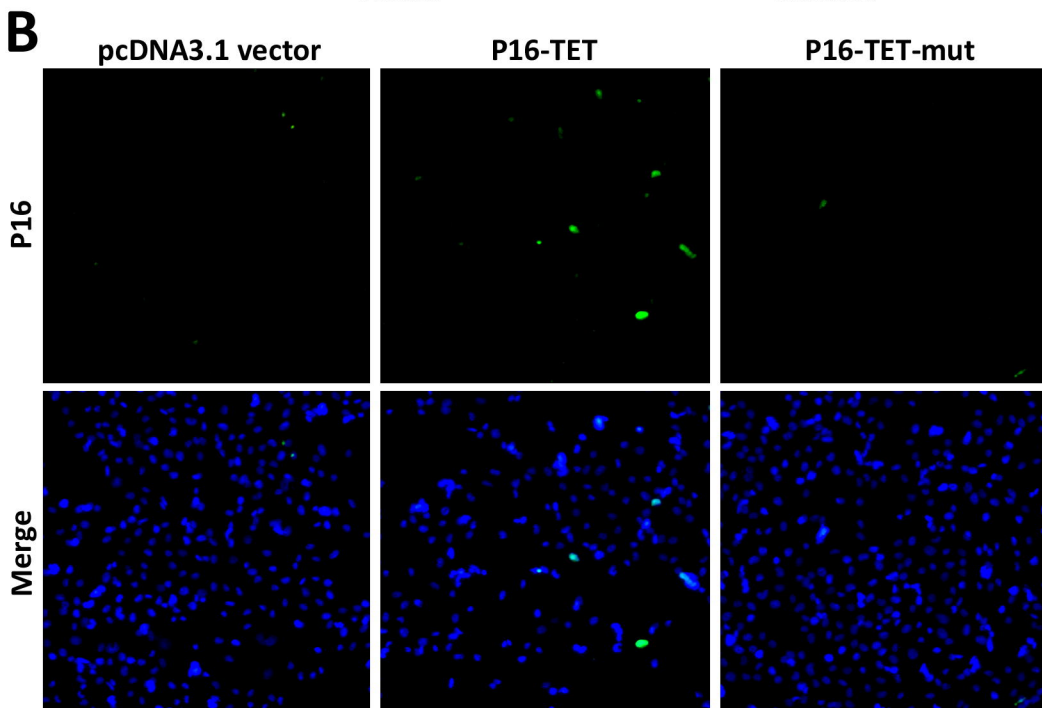

Fig.2



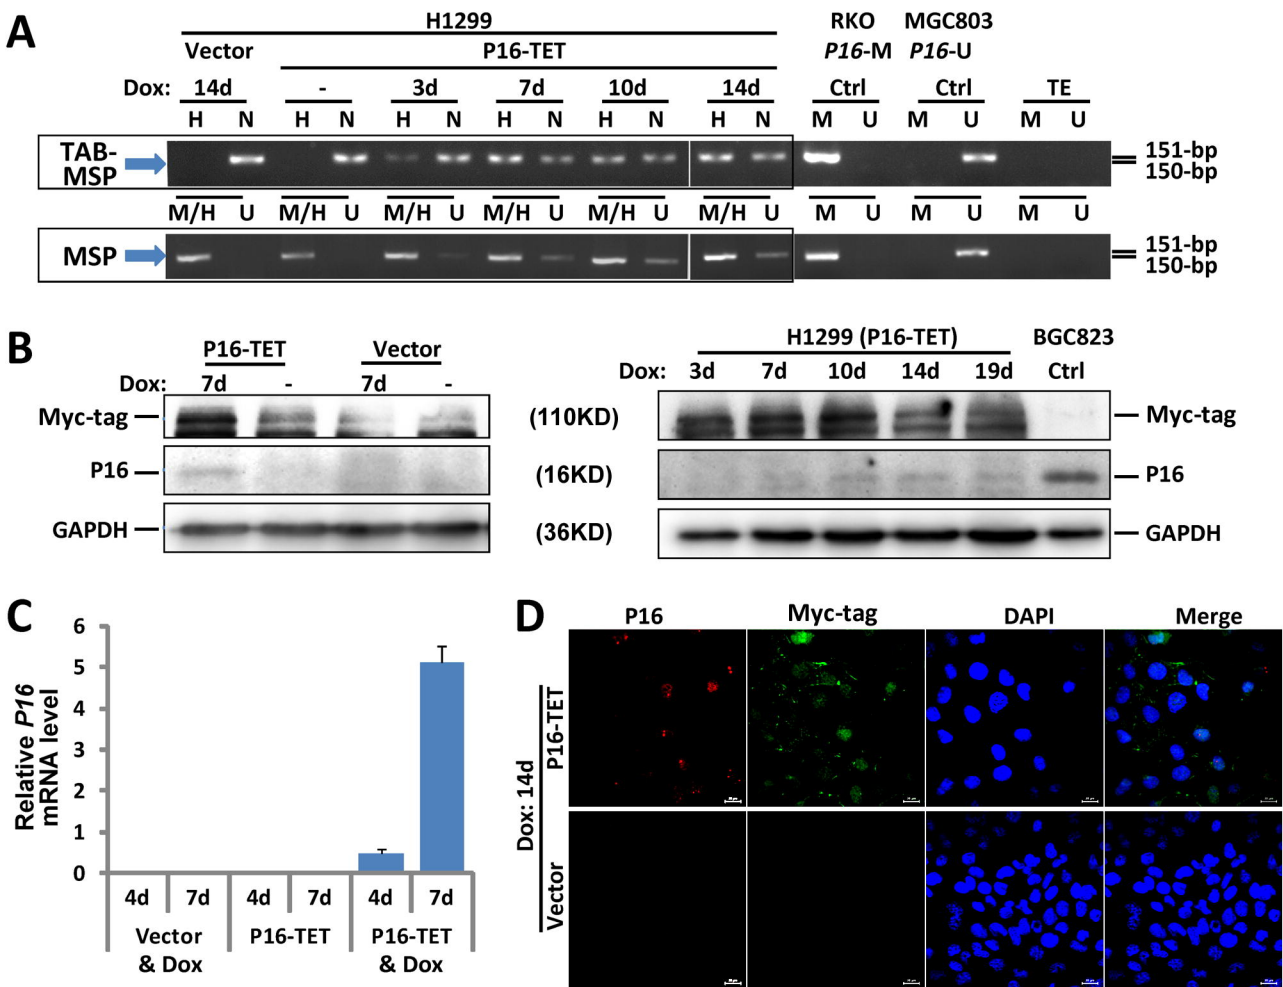

Fig.3

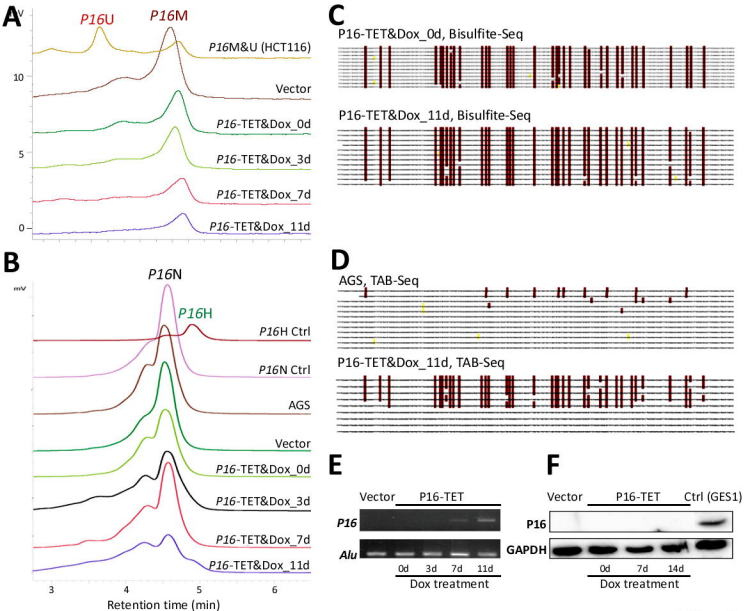

**Fig.4**

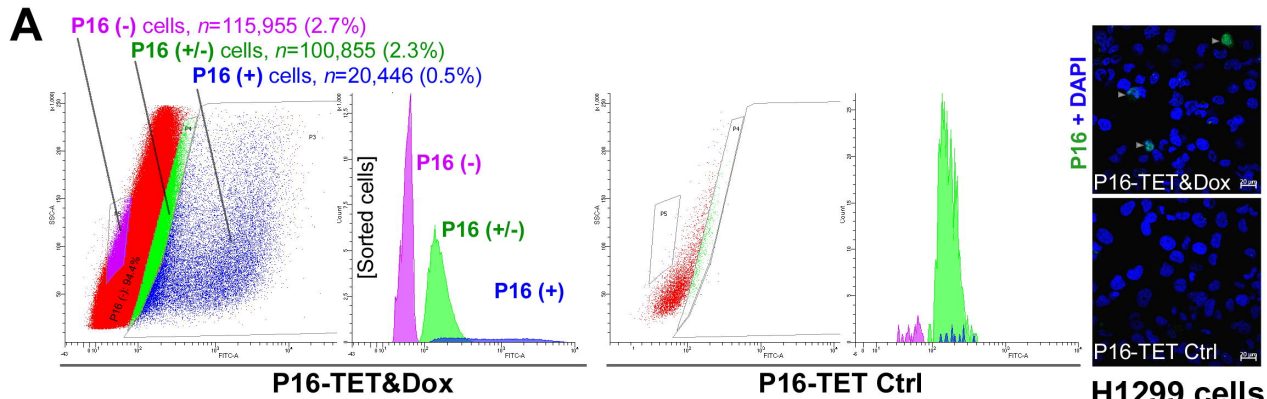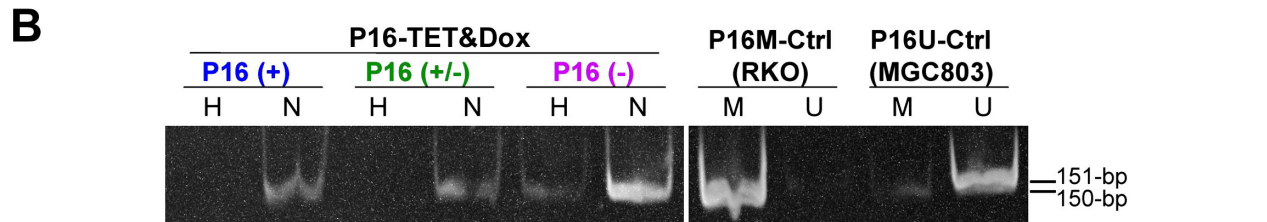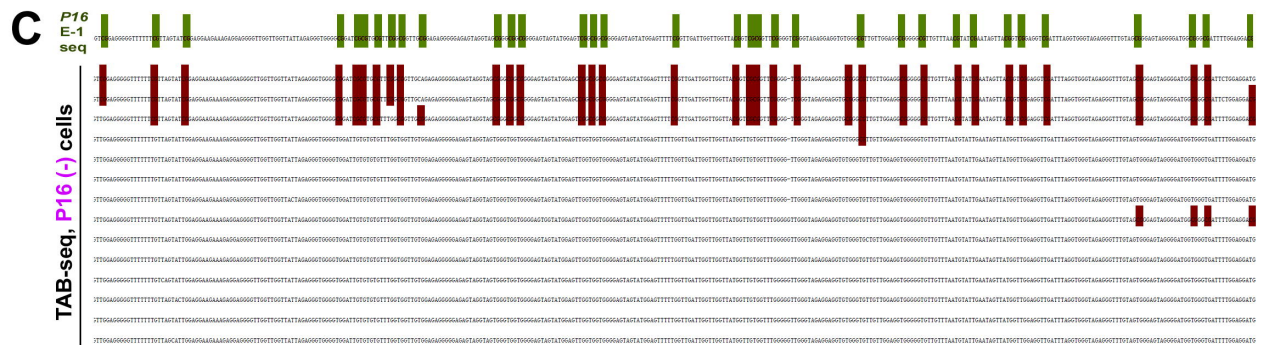

Fig.5

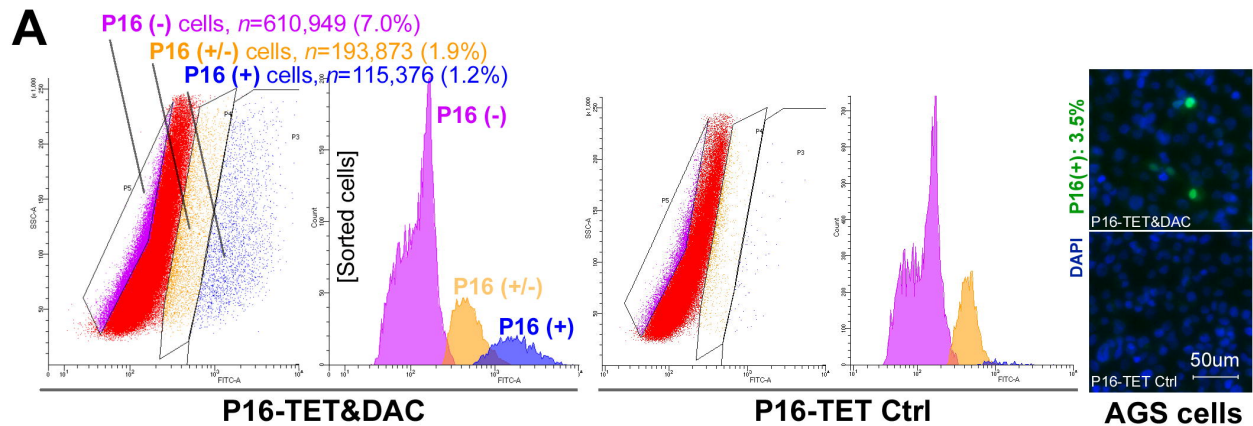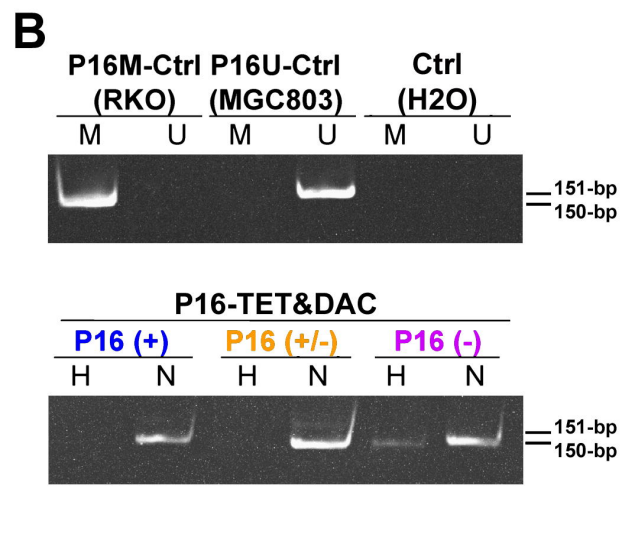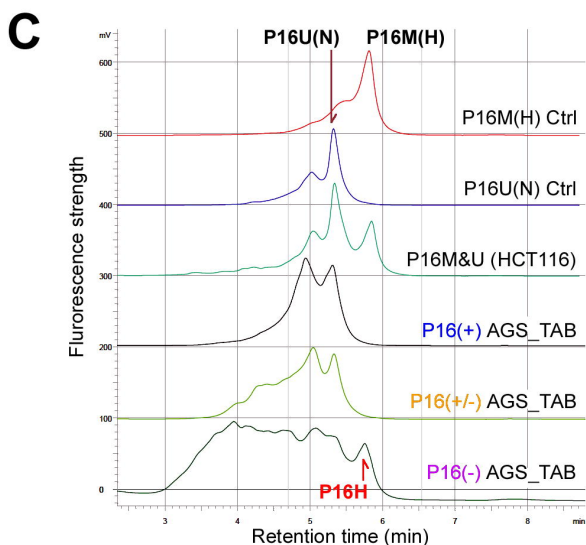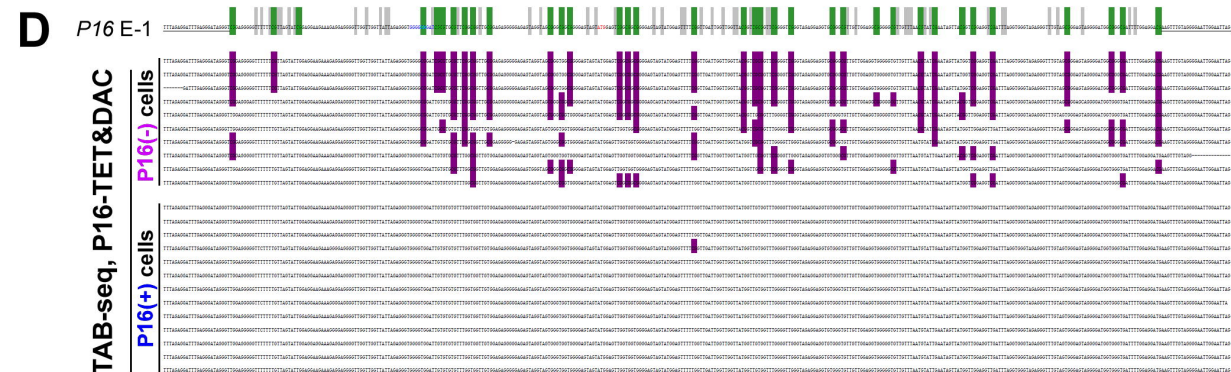

Fig.6

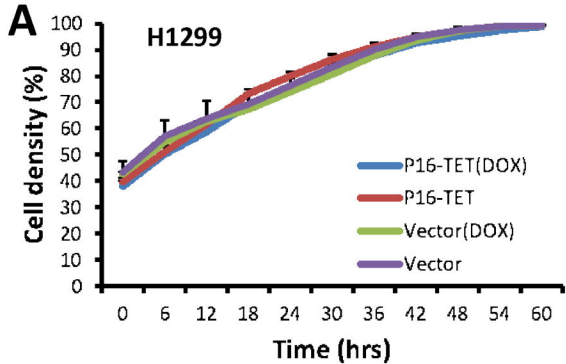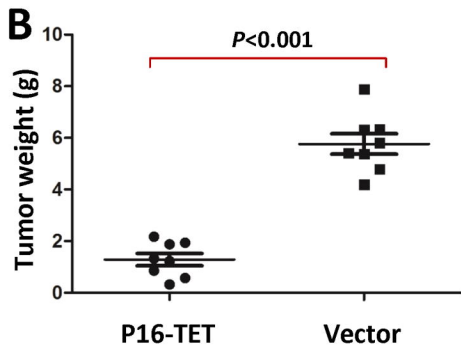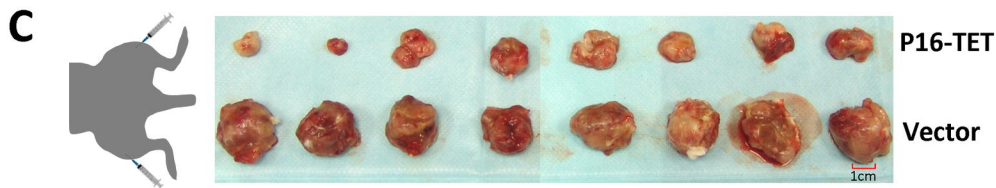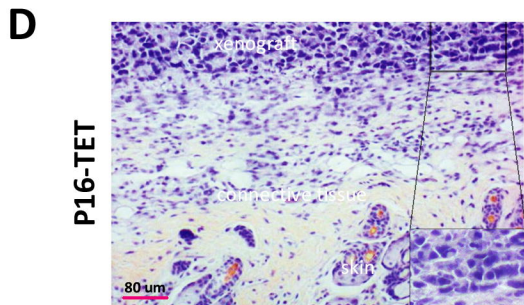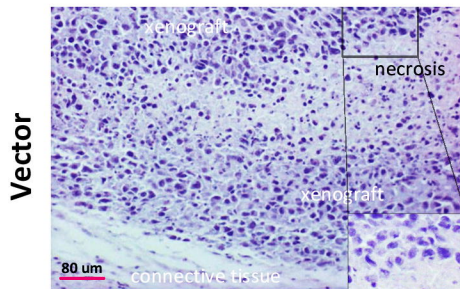

**Fig.7**



# 5hmC-ctrl seq TAB-sequencing

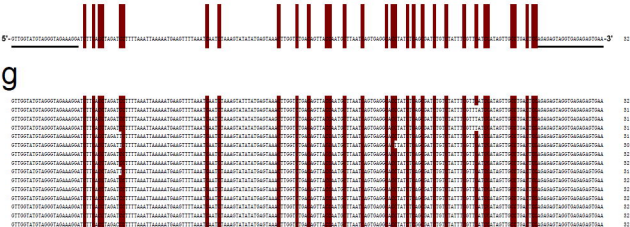

# Bisulfite-sequencing

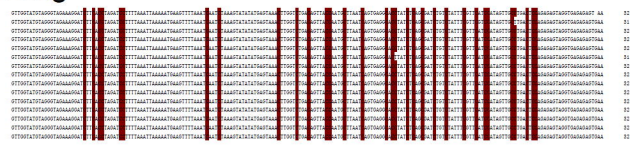

# 5mC-ctrl seq TAB-sequencing

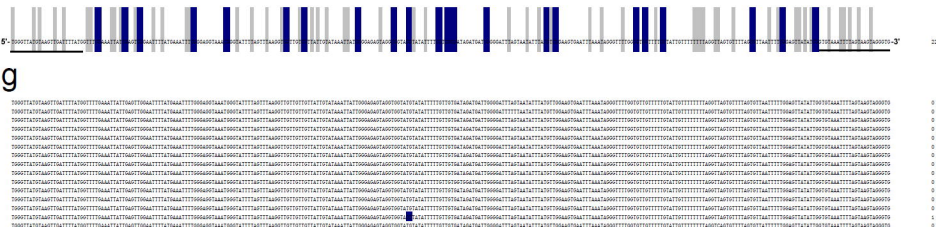

# Bisulfite-sequencing

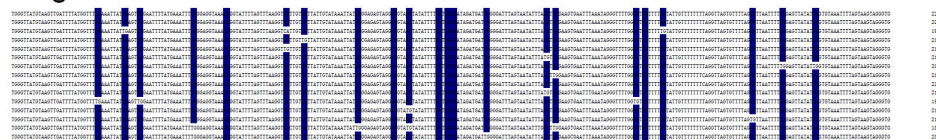

Fig. S1

**A**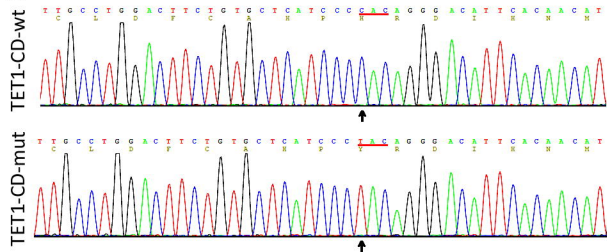**B**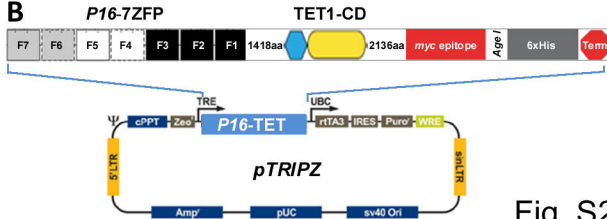

Fig. S2

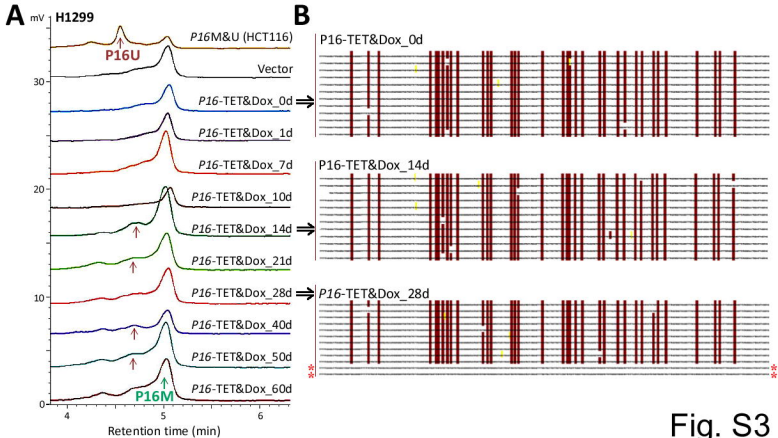



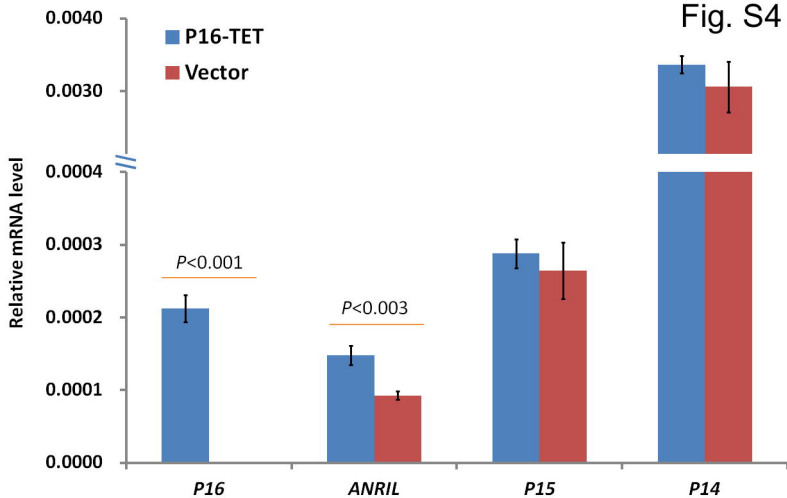

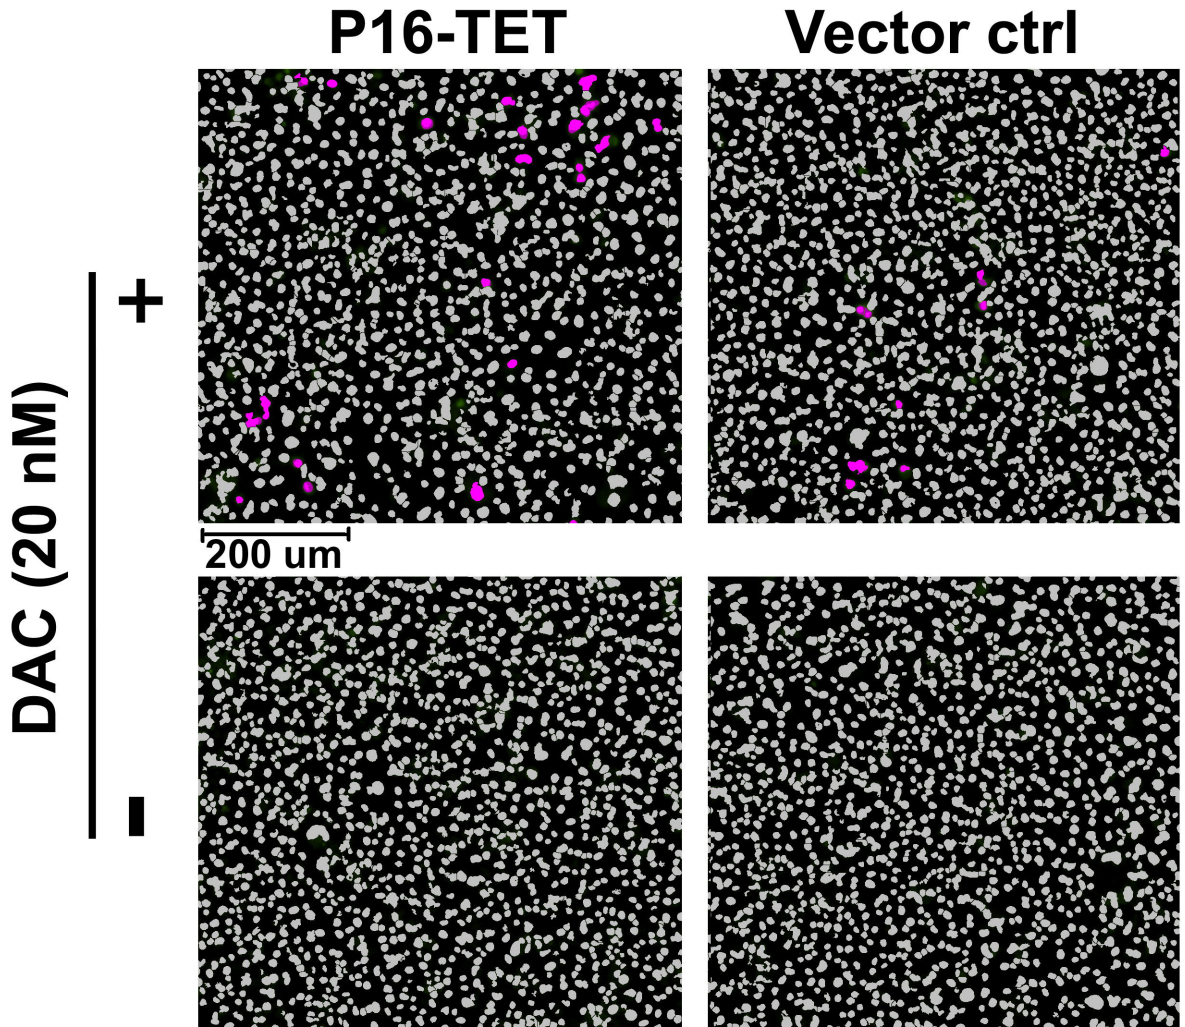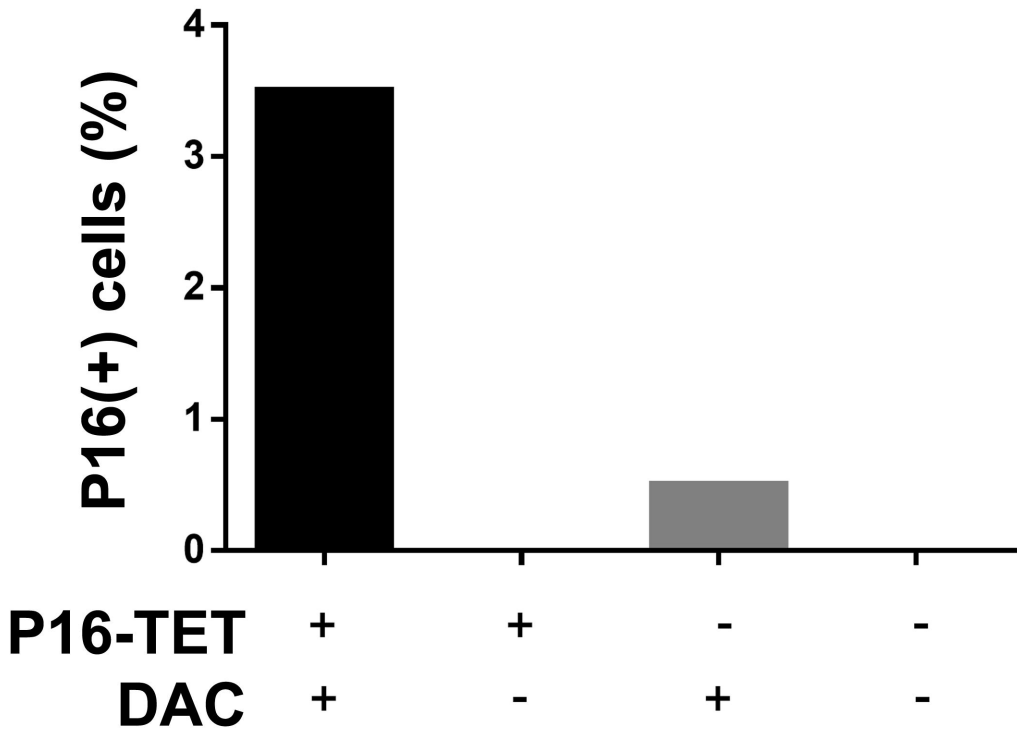

Fig. S5

**A** (H1299 cells)

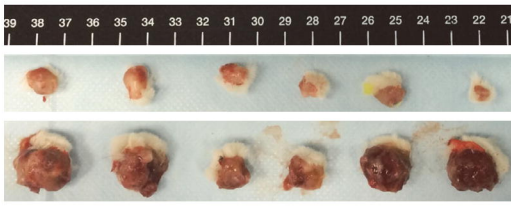

**B** (A549 cells)

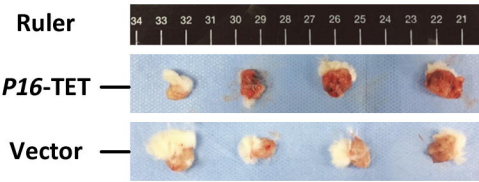

**P16-TET**

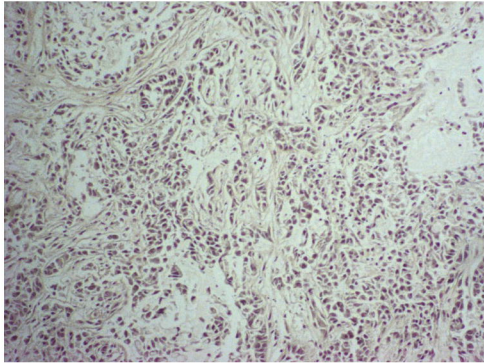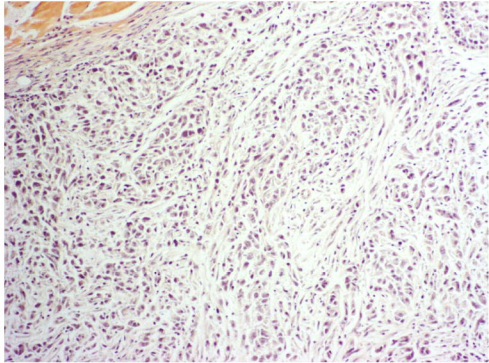

**Vector**

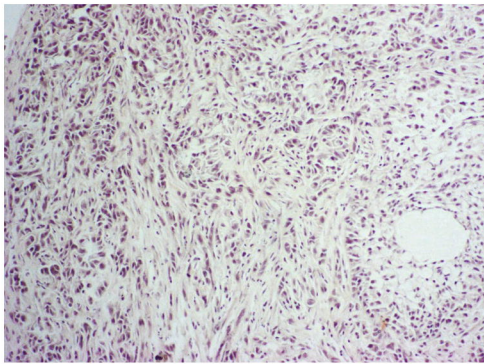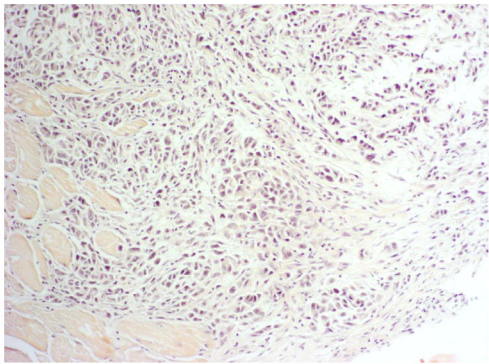

Fig. S6



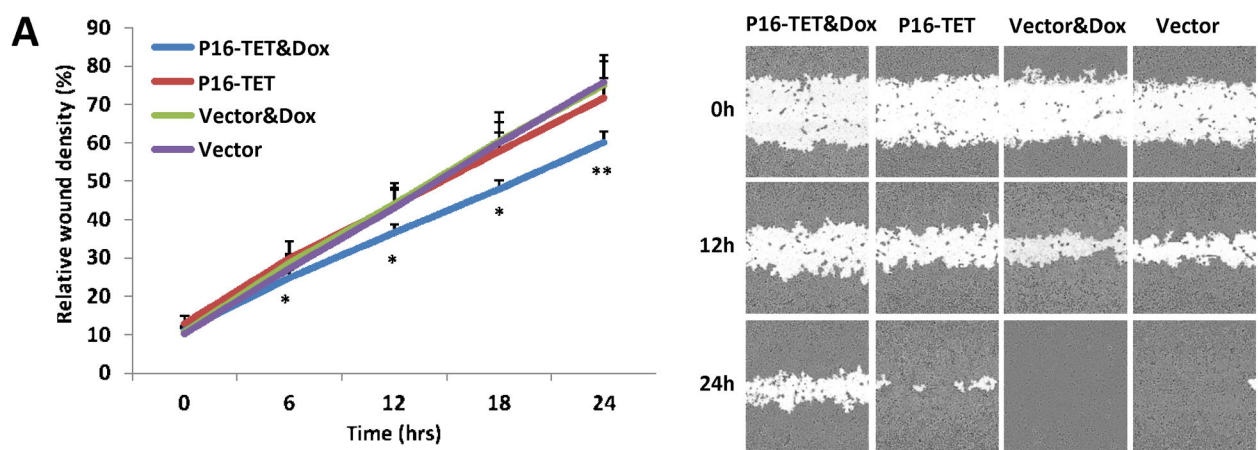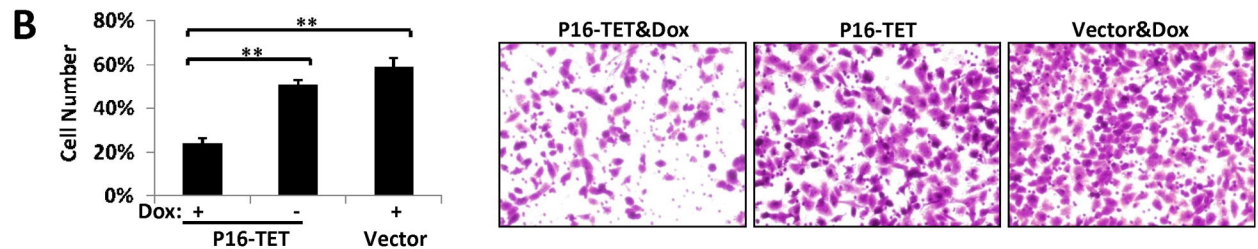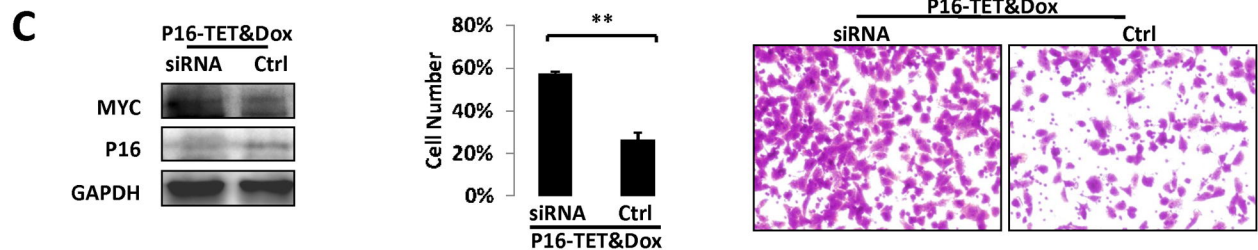

Fig. S7
